# Supplementary material for: A Single Nucleotide Deletion in an ABC Transporter Gene Leads to a Dwarf Phenotype in Watermelon
Source: Front Plant Sci. 2019 Nov 13;10:1399. doi: 10.3389/fpls.2019.01399 (PMC6863960; doi:10.3389/fpls.2019.01399)
Supplement: Table S1 — The list of watermelon germplasm used for analyzing allelic diversity of Cldw-1 gene. [file Table_1.xlsx]

## Sheet: TableS1
	Table S1. The list of watermelon germplasm used for analyzing allelic diversity of Cldw-1 gene.
Code	Accession Name	Plant Name	Taxonomy	Origin	Plant height description
1	PI 388770	W-153	Citrullus colocynthis	Morocco	Normal height
2	Grif 15895	Sugar baby	Citrullus lanatus	Canada	Normal height
3	PI 271778	No.13	Citrullus lanatus	South Africa, Transvaal	Normal height
4	PI 629102	Unknow	Unknow	Unknow	Normal height
5	PI 629107	Unknow	Unknow	Unknow	Normal height
6	PI 629110	Rhode island red	Citrullus lanatus	United States, Colorado	Normal height
7	PI 635606	King and queen winter	Citrullus lanatus	United States, California	Normal height
8	PI 635647	Unknow	Citrullus lanatus	Unknow	Normal height
9	PI 635665	Graybelle	Citrullus lanatus	United States, South Carolina	Normal height
10	PI 635698	Charleston tetra No.3	Citrullus lanatus	United States, South Carolina	Normal height
11	PI 635699	Charleston diploid 59-1	Citrullus lanatus	United States, South Carolina	Normal height
12	PI 635700	Charleston diploid 59-6	Citrullus lanatus	United States, South Carolina	Normal height
13	PI 635714	Sunny boy	Citrullus lanatus	United States, California	Normal height
14	PI 635732	Super sweet	Citrullus lanatus	United States, Colorado	Normal height
15	PI 271775	Kaffir	Citrullus amarus	South Africa, Transvaal	Normal height
16	PI 271779	No.14	Citrullus amarus	South Africa, Transvaal	Normal height
17	PI 299379	DL/64/490	Citrullus amarus	South Africa, Cape Province	Normal height
18	PI 162667	Mendocina	Citrullus lanatus	Argentina, Buenos Aires	Normal height
19	PI 164633	Pushani	Citrullus lanatus	India, Karnataka	Normal height
20	PI 164634	Pushani	Citrullus lanatus	India, Karnataka	Normal height
21	PI 164977	Bursa	Citrullus lanatus	Turkey, İstanbul	Normal height
22	PI 169290	Kurbagi alacasi	Citrullus lanatus	Turkey, Bursa	Normal height
23	PI 172798	8170	Citrullus lanatus	Turkey, Mardin	Normal height
24	PI 179882	Tarbuch	Citrullus lanatus	India, Gujarat	Normal height
25	PI 185636	Unknow	Citrullus lanatus	Ghana	Normal height
26	PI 186975	Egusi	Citrullus mucosospermus	Ghana	Normal height
27	PI 189316	Unknow	Unknow	Unknow	Normal height
28	PI 189317	No. 69	Citrullus lanatus	Nigeria	Normal height
29	PI 192937	Greenskin red	Citrullus lanatus	China, Shanghai Shi	Normal height
30	PI 203551	Unknow	Citrullus lanatus	United States, New Mexico	Normal height
31	PI 212288	No. 12930	Citrullus lanatus	Afghanistan, Herāt	Normal height
32	PI 222184	755	Citrullus lanatus	Afghanistan, Kandahār	Normal height
33	PI 222712	Hendevaneh	Citrullus lanatus	Iran, West Azerbaijan	Normal height
34	PI 227206	Asahi-yamato	Citrullus lanatus	Japan, Aiti	Normal height
35	PI 242906	Unknow	Citrullus lanatus	Afghanistan, Kābul	Normal height
36	PI 246029	Sandia	Citrullus lanatus	Chile, Biobío	Normal height
37	PI 249010	57-478	Citrullus lanatus	Nigeria, Kaduna	Normal height
38	PI 254431	Unknow	Citrullus lanatus	Lebanon	Normal height
39	PI 254623	Nahudi	Citrullus lanatus	Sudan, Khartoum	Normal height
40	PI 260733	Unknow	Citrullus lanatus	Sudan, Khartoum	Normal height
41	PI 266025	59.1006 (20) (X)	Citrullus lanatus	Venezuela, Aragua	Normal height
42	PI 266027	Unknow	Unknow	Unknow	Normal height
43	PI 270140	V13	Citrullus lanatus	India, Delhi	Normal height
44	PI 270143	C71	Citrullus lanatus	India, Delhi	Normal height
45	PI 270545	Unknow	Citrullus lanatus	Sudan, Khartoum	Normal height
46	PI 270546	No. 1	Citrullus lanatus	Ghana, Greater Accra	Normal height
47	PI 270548	No. 3	Citrullus lanatus	Ghana	Normal height
48	PI 270550	No. 5	Citrullus lanatus	Ghana	Normal height
49	PI 270551	Unknow	Unknow	Unknow	Normal height
50	PI 271774	No. 4	Citrullus amarus	South Africa, Transvaal	Normal height
51	PI 271982	No. 2	Citrullus lanatus	Somalia	Normal height
52	PI 271983	No. 3	Citrullus lanatus	Somalia	Normal height
53	PI 277279	Tarmuj	Citrullus lanatus	India	Normal height
54	PI 306782	Egusi	Citrullus mucosospermus	Nigeria	Normal height
55	PI 378611	Nyanga No. 1	Citrullus lanatus	Democratic Republic of the Congo	Normal height
56	PI 385964	Congo	Citrullus lanatus	Kenya	Normal height
57	PI 431579	Pusa rasal	Citrullus lanatus	India	Normal height
58	PI 435991	Tso hua	Citrullus lanatus	China, Shaanxi Sheng	Normal height
59	PI 464872	Unknow	Citrullus lanatus	China	Normal height
60	PI 470246	DB 11	Citrullus lanatus	Indonesia, Kalimantan	Normal height
61	PI 479247	Unknow	Unknow	Unknow	Normal height
62	PI 470248	DB 14	Citrullus lanatus	Indonesia, Kalimantan	Normal height
63	PI 470249	DB 22	Citrullus lanatus	Indonesia, Kalimantan	Normal height
64	PI 476324	Cel'nolistnyj 215	Citrullus lanatus	Soviet Union, Former	Normal height
65	PI 476325	Cernocemianuyj	Citrullus lanatus	Ukraine	Normal height
66	PI 476326	VIR 4573	Citrullus lanatus	Soviet Union, Former	Normal height
67	PI 476328	Unknow	Unknow	Unknow	Normal height
68	PI 479704	Unknow	Unknow	Unknow	Normal height
69	PI 487476	Malali	Citrullus lanatus	Israel	Normal height
70	PI 494815	Inamunwa	Citrullus lanatus	Zambia	Normal height
71	PI 494820	ZFA 3335	Citrullus lanatus	Zambia	Normal height
72	PI 508443	Olympia	Citrullus lanatus	Korea, South	Normal height
73	PI 508445	Unknow	Unknow	Unknow	Normal height
74	PI 560020	Egusi	Citrullus mucosospermus	Nigeria, Oyo	Normal height
75	PI 560901	Jing xing No. 1	Citrullus lanatus	China	Normal height
76	PI 593345	ZWRM 11	Citrullus lanatus	China, Shanghai Shi	Normal height
77	PI 593347	Yixuang	Citrullus lanatus	China, Henan Sheng	Normal height
78	PI 593348	Zhongyu No. 1	Citrullus lanatus	China, Henan Sheng	Normal height
79	PI 593350	Malingua	Citrullus lanatus	China, Henan Sheng	Normal height
80	PI 595200	WM-1	Citrullus lanatus	United States, Georgia	Normal height
81	PI 595201	WM-2	Citrullus lanatus	United States, Georgia	Normal height
82	PI 595202	WM-3	Citrullus lanatus	United States, Georgia	Normal height
83	PI 595203	Egusi	Citrullus mucosospermus	United States, Georgia	Normal height
84	PI 432337	Pikraggourka	Citrullus colocynthis	Cyprus	Normal height
85	PI 537300	At turshak (horse sour)	Citrullus colocynthis	Turkmenistan, Ahal	Normal height
86	PI 635598	Golden midget	Citrullus lanatus	United States, California	Normal height
87	PI 635618	Northern sweet	Citrullus lanatus	United States, California	Normal height
88	PI 635696	Charleston tetra No. 1	Citrullus lanatus	United States, South Carolina	Normal height
89	PI 635702	Black seeded ice cream	Citrullus lanatus	United States, Oregon	Normal height
90	PI 635721	Delicious big sugar	Citrullus lanatus	United States, Maryland	Normal height
91	PI 635730	Sugarlee	Citrullus lanatus	United States, Florida	Normal height
92	PI 482276	TGR 348	Citrullus amarus	Zimbabwe	Normal height
93	PI 482326	TGR 1069	Citrullus amarus	Zimbabwe	Normal height
94	PI 164709	9136	Citrullus lanatus	India, Karnataka	Normal height
95	PI 179876	Matira	Citrullus lanatus	India, Rajasthan	Normal height
96	PI 179883	Tarbuch	Citrullus lanatus	India, Gujarat	Normal height
97	PI 179886	Tarbuch	Citrullus lanatus	India, Gujarat	Normal height
98	PI 222711	Hendevaneh	Citrullus lanatus	Iran, West Azerbaijan	Normal height
99	PI 222715	Hendevaneh	Citrullus lanatus	Iran, Tehrān	Normal height
100	PI 229806	Unknow	Unknow	Unknow	Normal height
101	PI 233556	Unknow	Unknow	Unknow	Normal height
102	PI 251796	Unknow	Unknow	Unknow	Normal height
103	PI 270144	Angelokastron	Citrullus lanatus	Greece	Normal height
104	PI 270145	Manolados	Citrullus lanatus	Greece	Normal height
105	PI 270306	Unknow	Unknow	Unknow	Normal height
106	PI 270309	No. 4	Citrullus lanatus	Philippines	Normal height
107	PI 290855	Wills sugar melon	Citrullus lanatus	United States	Normal height
108	PI 435085	Unknow	Citrullus lanatus	China, Xinjiang Uygur Zizhiqu	Normal height
109	PI 438676	Charleston gray	Citrullus lanatus	Mexico, Yucatán	Normal height
110	PI 482292	TGR 695B	Citrullus lanatus	Zimbabwe	Normal height
111	PI 482323	TGR 925	Citrullus lanatus	Zimbabwe	Normal height
112	PI 525084	3	Citrullus lanatus	Egypt, Qena	Normal height
113	PI 537269	WKP-88-49	Citrullus lanatus	Pakistan, Punjab	Normal height
114	PI 537271	WKP-88-51	Citrullus lanatus	Pakistan, Punjab	Normal height
115	PI 593349	Shan Bei	Citrullus lanatus	China, Henan Sheng	Normal height
116	PI 593351	Unknow	Unknow	Unknow	Normal height
117	PI 593370	Unknow	Unknow	Unknow	Normal height
118	PI 593371	Raketawuzi	Citrullus lanatus	China, Xinjiang Uygur Zizhiqu	Normal height
119	PI 593376	Unknow	Unknow	Unknow	Normal height
120	PI 593379	Xianxiaogua	Citrullus lanatus	China, Xinjiang Uygur Zizhiqu	Normal height
121	PI 593380	Jinlu	Citrullus lanatus	China, Xinjiang Uygur Zizhiqu	Normal height
122	PI 271769	Karkaer	Citrullus amarus	South Africa, Transvaal	Normal height
123	PI 271773	P.H.R.S. No. 19	Citrullus amarus	South Africa, Transvaal	Normal height
124	PI 494531	Egusi	Citrullus mucosospermus	Nigeria, Oyo	Normal height
125	PI 314655	369	Citrullus lanatus	Uzbekistan	Normal height
126	PI 556994	Au-sweet scarlet	Citrullus lanatus	United States, Alabama	Normal height
127	PI 600951	Chubby gray	Citrullus lanatus	United States	Normal height
128	PI 320988	Sweet sensation	Citrullus lanatus	Sierra Leone	Normal height
129	PI 600950	Crimson diamond	Citrullus lanatus	United States	Normal height
130	PI 248178	Mangara	Citrullus mucosospermus	Democratic Republic of the Congo	Normal height
131	PI 612472	Bingguare	Citrullus lanatus	Korea, South, Pusan	Normal height
132	PI 629106	Unknow	Unknow	Unknow	Normal height
133	PI 635594	Unknow	Unknow	Unknow	Normal height
134	PI 635600	Unknow	Unknow	Unknow	Normal height
135	PI 635713	Unknow	Unknow	Unknow	Normal height
136	PI 635614	Klondike striped blue ribbon	Citrullus lanatus	United States, Colorado	Normal height
137	PI 635630	Merrimack sweetheart	Citrullus lanatus	United States, New Hampshire	Normal height
138	PI 635631	Super redhart stone mountain	Citrullus lanatus	United States, Georgia	Normal height
139	PI 635637	Ice box red flesh	Citrullus lanatus	United States, Illinois	Normal height
140	PI 635683	Sweet siberian	Citrullus lanatus	United States, Wyoming	Normal height
141	PI 635686	Wills sugar	Citrullus lanatus	United States, Wyoming	Normal height
142	PI 635688	Crimson sweet	Citrullus lanatus	United States, Kansas	Normal height
143	PI 635709	Hawkesbury wilt resistant	Citrullus lanatus	Australia, Queensland	Normal height
144	PI 266028	59.1007 (2) (X)	Citrullus lanatus	Venezuela, Aragua	Normal height
145	PI 269680	Sweetheart	Citrullus lanatus	Belize	Normal height
146	PI 518607	Unknow	Unknow	Unknow	Normal height
147	PI 601182	Charleston elite	Citrullus lanatus	United States	Normal height
148	PI 629105	Unknow	Unknow	Unknow	Normal height
149	PI 248774	Summa	Citrullus amarus	Namibia	Normal height
150	PI 600896	Sun gold	Citrullus lanatus	United States	Normal height
151	PI 600962	Big crimson	Citrullus lanatus	United States	Normal height
152	PI 601228	Yellow crimson	Citrullus lanatus	United States	Normal height
153	PI 601289	Sunsugar	Citrullus lanatus	United States	Normal height
154	PI 635642	Charleston gray 133	Citrullus lanatus	United States, Indiana	Normal height
155	PI 665007	Unknow	Unknow	Unknow	Normal height
156	PI 635597	Golden honey cream	Citrullus lanatus	United States, California	Normal height
157	WT1		Citrullus lanatus	China	Normal height
158	WT2		Citrullus lanatus	China	Normal height
159	WT5		Citrullus lanatus	China	Normal height
160	WT6		Citrullus lanatus	China	Normal height
161	WT8		Citrullus lanatus	China	Normal height
162	WT9		Citrullus lanatus	China	Normal height
163	WT10		Citrullus lanatus	China	Normal height
164	WT12		Citrullus lanatus	China	Normal height
165	WT13		Citrullus lanatus	China	Normal height

## Sheet: Table S2
Table S2. The list of primers used for mapping and qRT-PCR analysis.
Marker Name	Chromosome	Physical position	Forward primer	Reverse primer	Comment
ClSSR25404	Chr9	20794736	TACATGTGGTAGGGTTGGCA	GGAGAGGATGCGAAAGACAG	used for mapping
ClSSR25431	Chr9	21216546	GCGAAATGTGTCTATTTATCAGTG	GGACTCGTACCAAAATTGGAG	used for mapping
ClSSR25437	Chr9	21295977	TTTTTCCTTATTTGCCACGG	CCCAAAATTGAAAAACCAGC	used for mapping
ClSSR25478	Chr9	21727573	GGGGGATTGAAACAAAGGAT	TTTCGTTTAGGGACAGGTGG	used for mapping
ClSSR25487	Chr9	21747319	GCTTCACTTTTCCCTTTCTCA	GTGGGATCCCTCTCTCTTCC	used for mapping
ClSSR25501	Chr9	21908860	TGATTCCACAACCCCAATTT	TGGAGAGTCGTTGTCCTAACA	used for mapping
ClSSR25517	Chr9	22056127	GGGCAACCACAATTTAAGTCA	TGGTCGACATTGTTTGTTCG	used for mapping
ClSSR25539	Chr9	22289494	CCAAAAACATCTTTCCTAGGCT	ATAGGTTGTGAATAATTTGCCC	used for mapping
ClSSR25588	Chr9	22841632	GACTGCAAGCAACATCTCCA	GTGAATTGCACACTTGGTGG	used for mapping
ClSSR25613	Chr9	23428203	GGGATAAATACGGATAAATGTCCA	TATGGCATTGTGCATCATCA	used for mapping
ClSSR25629	Chr9	23668452	TTAACTAAGGCGGGTGGGAT	AAGAGGGCTCGAGACATTGA	used for mapping
ClSSR25672	Chr9	24438147	ATAAGTGGGGTTTCGAAGGG	ATTGCCTTTTCAATGGATGC	used for mapping
ClSSR25673	Chr9	24442183	TCCAACAAGTTGCTCCTTCA	CTGCGATAGACCGCAATAGA	used for mapping
ClSSR25686	Chr9	24687484	CAACAGTTCAATTTTAGTCTTCCAC	AAATAATCCGCTAACTACGCAA	used for mapping
ClSSR25882	Chr9	28784011	TTGACTTTGAAATCCCTTTAGGAG	TGGCTGCAGTTATATCACATTT	used for mapping
ClSSR25894	Chr9	28920539	TCCTAACCTTTGATTGATGGAGA	AAATGGGAACAAGTAATGCCA	used for mapping
ClSSR25923	Chr9	29278266	TCGTCTTGTGATTGTGTAACGA	TCCCTTAATGTTTCCCTCCA	used for mapping
ClSSR25954	Chr9	29711490	CCTGAGGTTGCATGGTAGGT	GTATCCAAATCACGCGATCA	used for mapping
ClSSR26018	Chr9	30330624	ACTCCATCCCAAACGTCATC	CAAAACCCAAACGCAAAGTT	used for mapping
ClSSR26045	Chr9	30500671	CGAAAAATGGCACGAAAATC	TCATGAAATGCCACCACCTA	used for mapping
ClSSR26094	Chr9	30841862	ATAACCAAAGCGAAGAGCCA	AGTGGGTCTGTTTCCCCTTT	used for mapping
ClSSR26104	Chr9	30888652	TGAGAGCGAATTGTCACAAAA	CGAACCCATCCCGTTACTTA	used for mapping
ClSSR26108	Chr9	30898007	TTTCAAGCGCTCCAAAAAGT	CTGCAGACATGACTCATTAGCAC	used for mapping
ClSSR26111	Chr9	30915047	TCTTTGCAGTTTAAGGAGCTGTT	TCCTCCCCTTTCTCTATTGTTT	used for mapping
ClSSR26135	Chr9	31091570	CCTTTCCCCTTTTGCTTTTC	AGACATAACAGCCATCACCACT	used for mapping
ClSSR26174	Chr9	31395636	CCCATTTCTGCTTTGCCTTA	TGGGACGATCTTTGCCTAGT	used for mapping
ClSSR26248	Chr9	31902016	CCAATTGCTTCAAGTCCCAT	TCCCTGCCAATTACCATAGC	used for mapping
ClSSR26120	Chr9	31008457	GGCTCTCAACTTTCTAAGGTAGG	CCACAAAGGATGTGTCATGG	used for mapping
ClSSR26134	Chr9	31087299	AACACACCCATTTGCACGTA	ATGAGAGGAGGAGAATGGGG	used for mapping
dCAPS1	Chr9	30394615	GCAGTAATAGCCCCACAAAAAC	CTAGTTGGAAATGGGGTGATTTAGAA	used for mapping	Digest by EcoRI
dCAPS2	Chr9	30481809	AAAACTGGATGCAATGAAAACA	TTTGCCCCTATACTTTAAAGCT	used for mapping	Digest by HindIII
dCAPS3	Chr9	30484022	TATGCTTATACTCTCACTGGAATT	TTAACATTGCAGCCAAAAATAG	used for mapping	Digest by EcoRI
Indel1	Chr9	30486302	TGATGCTCGCAGGTAAAATA	ATCCCACTTCATTCCTCAAA	used for mapping
ClCAC			AATTGTGGTTGATGCTGCAC	TGACAGCTGTACCTGGCATC	used for qRT-PCR
Cldw1			TTGTTGTCTTGGTTGTTACTG	AATTGATTCACCACCTCTAATG	used for qRT-PCR

## Sheet: Table S3
Table S3. The physical position and gene annotation for the six genes in the candidate region.
Gene ID	Physical position	Function annotation
Cla010332	Chr9:30413537..30414657	MYB family transcription factor
Cla010333	Chr9:30427735..30429018	60S ribosomal protein L34
Cla010334	Chr9:30436454..30438326	unknown function
Cla010335	Chr9:30442581..30446474	Serine protease
Cla010336	Chr9:30455234..30458151	Nucleosome assembly protein (NAP)
Cla010337	Chr9:30482927..30489303	ABC transporter
